# Supplementary material for: A new survival model based on ferroptosis-related genes for prognostic prediction in clear cell renal cell carcinoma
Source: publisher site journal article supplement (doi:10.18632/aging.103553), 2020-07-20
Supplement: Supplementary file [file aging-v12i14-103553-supplementary-material-SD1.pdf]

SUPPLEMENTARY FIGURES

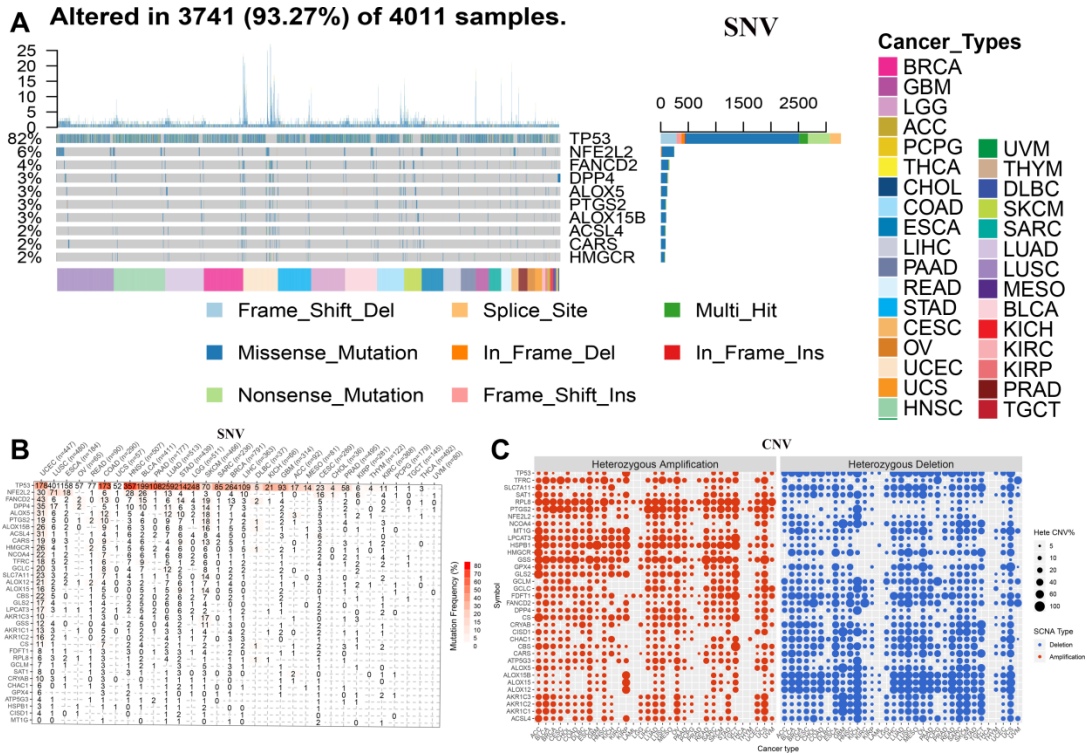

**Supplementary Figure 1. Pan-cancer genetic alterations of FRG.** (A, B) The mutation frequency of FRG across 32 cancer types. (C) The CNV alteration frequency of FRG across cancer types. The deletion (right) and amplification frequencies (left).

### Pathway activity

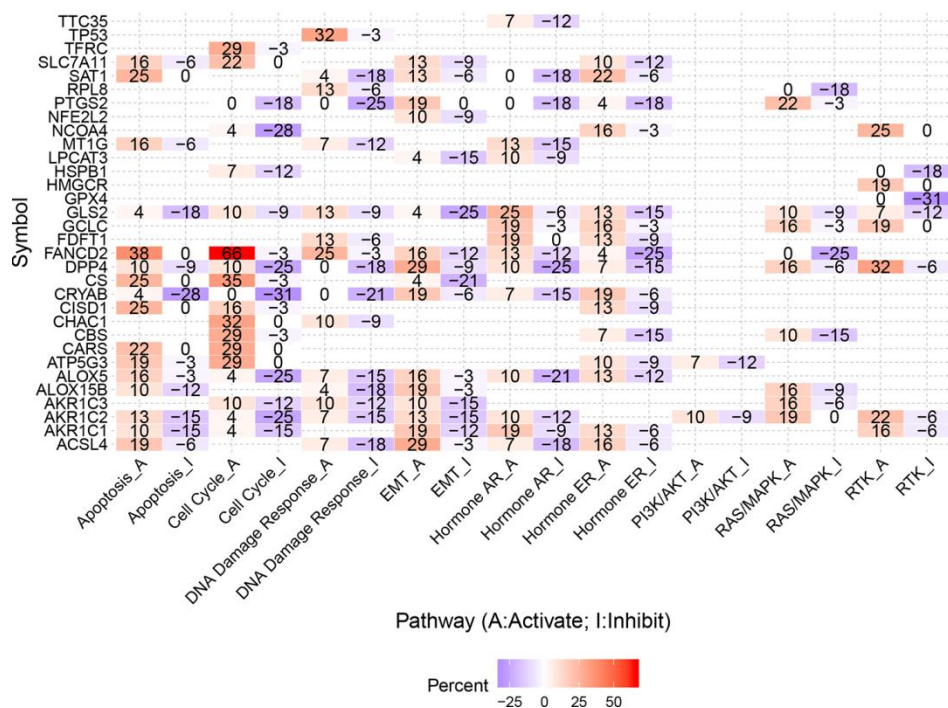

**Supplementary Figure 2. Pathway analysis of FRG.** Network diagram demonstrating the correlation between FRG and cancer pathways; red = positive correlation, blue = negative correlation.
