# Supplementary material for: A new survival model based on ferroptosis-related genes for prognostic prediction in clear cell renal cell carcinoma
Source: publisher site journal article supplement (doi:10.18632/aging.103553), 2020-07-20
Supplement: Supplementary file [file aging-v12i14-103553-supplementary-material-SD7.pdf]

## SUPPLEMENTARY TABLES

**Supplementary Table 6. Univariate analysis of risk score and other KIRC clinical data.**

| <b>id</b> | <b>HR</b> | <b>HR.95L</b> | <b>HR.95H</b> | <b>pvalue</b> |
|-----------|-----------|---------------|---------------|---------------|
| age       | 1.029049  | 1.015526      | 1.042753      | 2.21E-05      |
| gender    | 0.953475  | 0.693387      | 1.311121      | 0.769403      |
| grade     | 2.303129  | 1.870932      | 2.835165      | 3.62E-15      |
| stage     | 1.900087  | 1.659546      | 2.175493      | 1.48E-20      |
| T         | 1.934057  | 1.634871      | 2.287994      | 1.44E-14      |
| M         | 4.509619  | 3.290467      | 6.180481      | 7.51E-21      |
| riskScore | 1.172773  | 1.128116      | 1.219197      | 8.55E-16      |

**Supplementary Table 7. Multivariate regression analysis of risk score and other KIRC clinical data.**

| <b>id</b> | <b>HR</b> | <b>HR.95L</b> | <b>HR.95H</b> | <b>pvalue</b> |
|-----------|-----------|---------------|---------------|---------------|
| age       | 1.034601  | 1.019246      | 1.050187      | 8.25E-06      |
| gender    | 0.95717   | 0.690262      | 1.327283      | 0.792975      |
| grade     | 1.478108  | 1.170279      | 1.866907      | 0.001039      |
| stage     | 1.819611  | 1.151655      | 2.874979      | 0.010318      |
| T         | 0.766397  | 0.503673      | 1.166164      | 0.214151      |
| M         | 1.269594  | 0.639759      | 2.519492      | 0.49485       |
| riskScore | 1.14614   | 1.09283       | 1.20205       | 1.99E-08      |

**Supplementary Table 8. Regulatory relationship between transcription factors and FRGs**

| <b>TF</b> | <b>FRGs</b> | <b>cor</b> | <b>pvalue</b> | <b>Regulation</b> |
|-----------|-------------|------------|---------------|-------------------|
| BATF      | FANCD2      | 0.424352   | 2.09E-24      | postive           |
| CEBPA     | ALOX5       | 0.430824   | 3.49E-25      | postive           |
| CEBPB     | NCOA4       | -0.40479   | 3.70E-22      | negative          |
| CENPA     | CARS        | 0.444214   | 7.59E-27      | postive           |
| CENPA     | FANCD2      | 0.760034   | 3.86E-100     | postive           |
| CENPA     | CBS         | 0.490092   | 3.93E-33      | postive           |
| CIITA     | ALOX12      | 0.417909   | 1.19E-23      | postive           |
| E2F1      | FANCD2      | 0.584767   | 1.43E-49      | postive           |
| EOMES     | FANCD2      | 0.423908   | 2.36E-24      | postive           |
| ETS1      | GSS         | -0.47768   | 2.45E-31      | negative          |
| ETS1      | GPX4        | -0.49883   | 1.93E-34      | negative          |
| ETS1      | HSPB1       | -0.45975   | 7.20E-29      | negative          |
| EZH2      | FANCD2      | 0.749936   | 4.24E-96      | postive           |
| FLI1      | GSS         | -0.45969   | 7.33E-29      | negative          |
| FLI1      | GPX4        | -0.45103   | 1.01E-27      | negative          |
| FLI1      | ATP5MC3     | -0.43823   | 4.29E-26      | negative          |
| FOXM1     | CARS        | 0.466305   | 9.38E-30      | postive           |
| FOXM1     | TFRC        | 0.407549   | 1.82E-22      | postive           |
| FOXM1     | FANCD2      | 0.695871   | 2.29E-77      | postive           |
| FOXM1     | CBS         | 0.630685   | 1.10E-59      | postive           |
| GATA2     | CHAC1       | 0.43485    | 1.12E-25      | postive           |
| GATA3     | CBS         | 0.52576    | 1.01E-38      | postive           |
| HEY1      | GSS         | -0.41796   | 1.18E-23      | negative          |
| HIF1A     | ACSL4       | 0.499759   | 1.39E-34      | postive           |
| LMNB1     | CARS        | 0.402936   | 5.94E-22      | postive           |
| LMNB1     | TFRC        | 0.414054   | 3.33E-23      | postive           |
| LMNB1     | FANCD2      | 0.750462   | 2.64E-96      | postive           |
| MEF2C     | GSS         | -0.44669   | 3.67E-27      | negative          |
| MEF2C     | GPX4        | -0.45883   | 9.54E-29      | negative          |
| MYBL2     | CARS        | 0.460291   | 6.10E-29      | postive           |
| MYBL2     | FANCD2      | 0.702684   | 1.72E-79      | postive           |
| MYBL2     | CBS         | 0.443459   | 9.46E-27      | postive           |
| MYC       | NFE2L2      | 0.417635   | 1.28E-23      | postive           |
| NCAPG     | CARS        | 0.471307   | 1.92E-30      | postive           |
| NCAPG     | TFRC        | 0.402843   | 6.09E-22      | postive           |
| NCAPG     | FANCD2      | 0.774639   | 2.36E-106     | postive           |
| NCAPG     | CBS         | 0.532948   | 6.24E-40      | postive           |
| PBX1      | NCOA4       | 0.428139   | 7.36E-25      | postive           |
| PRDM1     | GSS         | -0.42233   | 3.63E-24      | negative          |
| PRDM1     | GPX4        | -0.43305   | 1.87E-25      | negative          |
| PRDM1     | ATP5MC3     | -0.43383   | 1.50E-25      | negative          |
| SREBF2    | HMGCR       | 0.56739    | 3.80E-46      | postive           |
| SREBF2    | CS          | 0.504764   | 2.37E-35      | postive           |
| SREBF2    | FDFT1       | 0.492813   | 1.55E-33      | postive           |
| VDR       | HMGCR       | 0.400825   | 1.02E-21      | postive           |
