# Supplementary material for: A new survival model based on ferroptosis-related genes for prognostic prediction in clear cell renal cell carcinoma
Source: Aging (Albany NY). 2020 Jul 20;12(14):14933–48. doi: 10.18632/aging.103553 (PMC7425493; doi:10.18632/aging.103553)
Supplement: Supplementary Table 1 [file aging-12-103553-s006..xlsx]

## Sheet: Sheet1
id	TCGA-CZ-5465-11A-01R-1503-07	TCGA-CJ-6030-11A-01R-1672-07	TCGA-CZ-5985-11A-01R-1672-07	TCGA-B0-5701-11A-01R-1541-07	TCGA-B0-5699-11A-01R-1541-07	TCGA-CJ-5680-11A-01R-1541-07	TCGA-CW-5589-11A-01R-1541-07	TCGA-CJ-5677-11A-01R-1541-07	TCGA-CZ-5451-11A-01R-1503-07	TCGA-B8-5549-11A-01R-1541-07	TCGA-CZ-4865-11A-01R-1503-07	TCGA-CJ-5678-11A-01R-1541-07	TCGA-CW-6087-11A-01R-1672-07	TCGA-CZ-5470-11A-01R-1503-07	TCGA-B2-5641-11A-01R-1541-07	TCGA-CZ-5453-11A-01R-1503-07	TCGA-CZ-5987-11A-01R-1672-07	TCGA-CZ-5458-11A-01R-1503-07	TCGA-B0-5706-11A-01R-1541-07	TCGA-B0-4712-11A-02R-1503-07	TCGA-B0-4700-11A-01R-1541-07	TCGA-CW-5581-11A-01R-1541-07	TCGA-CZ-5454-11A-01R-1503-07	TCGA-CZ-5462-11A-01R-1503-07	TCGA-CZ-4864-11A-01R-1503-07	TCGA-CW-5585-11A-01R-1541-07	TCGA-A3-3387-11A-01R-1541-07	TCGA-CZ-4863-11A-01R-1503-07	TCGA-B0-5690-11A-01R-1541-07	TCGA-B8-4622-11A-01R-1758-07	TCGA-CZ-5457-11A-01R-1503-07	TCGA-CZ-5463-11A-01R-1503-07	TCGA-B8-4620-11A-01R-1758-07	TCGA-CJ-5676-11A-01R-1541-07	TCGA-B0-5402-11A-01R-1503-07	TCGA-B0-5709-11A-01R-1541-07	TCGA-CW-5580-11A-02R-1672-07	TCGA-B0-5705-11A-01R-1541-07	TCGA-CZ-5988-11A-01R-1672-07	TCGA-CW-5584-11A-01R-1541-07	TCGA-CZ-5468-11A-01R-1503-07	TCGA-CZ-5469-11A-01R-1503-07	TCGA-B0-5694-11A-01R-1541-07	TCGA-B2-5636-11A-01R-1541-07	TCGA-CJ-5679-11A-01R-1541-07	TCGA-CZ-5455-11A-01R-1503-07	TCGA-CZ-5456-11A-02R-1503-07	TCGA-CW-5591-11A-01R-1541-07	TCGA-CZ-5452-11A-01R-1503-07
HMGCR	11.8313	11.9427	10.765	8.18074	14.7706	9.99397	12.2435	9.61504	10.0889	7.85413	13.2155	8.97424	9.6063	7.64708	8.60145	11.7038	11.5702	12.8033	8.96286	13.1834	7.13254	11.2817	13.4691	10.4489	9.53628	13.7173	10.2107	10.8689	9.16871	8.69998	8.66637	14.2355	11.576	10.0818	8.67957	14.6247	9.2757	9.20315	12.3573	9.79537	9.79549	12.7344	10.8717	9.21494	12.0842	10.3592	6.78212	4.61718	11.1667
GSS	17.5523	49.2526	35.7907	24.5965	36.082	35.6094	43.5827	35.1428	43.9751	15.7682	22.6626	30.3427	26.2979	20.8889	16.5128	18.9927	27.9936	21.6102	21.4799	26.2679	28.8246	38.453	21.104	26.9149	46.5074	43.4058	44.2927	24.5562	30.5275	37.5387	27.0936	22.9062	24.5155	37.2678	33.3244	46.9607	21.4559	21.6412	34.0183	37.0242	26.3497	22.7429	31.4633	33.8084	28.3987	25.1957	21.3193	29.2559	17.0067
RPL8	288.12	407.18	215.402	327.006	282.102	357.195	370.131	263.641	280.981	318.629	380.458	305.481	260.188	460.234	278.659	325.669	343.44	397.83	394.829	415.682	266.935	327.186	362.162	458.317	287.274	414.687	420.353	354.595	313.4	533.916	468.547	333.509	446.269	368.095	351.427	331.51	317.24	292.304	250.175	478.776	584.551	420.736	338.453	256.708	363.048	471.876	426.422	613.316	359.898
EMC2	9.72222	10.6407	8.50111	7.82956	8.88575	9.65438	9.79164	8.85128	9.44852	8.79157	8.99295	7.4509	9.6471	8.91141	9.76323	9.56314	10.4358	9.5419	11.9991	9.79956	8.78508	7.70204	9.74203	11.4206	7.16865	9.12665	7.64681	8.39642	8.35378	8.85246	8.4815	10.1787	10.4379	9.50086	9.33362	9.84219	10.5459	8.10531	9.85703	9.64051	8.85117	9.95285	9.49941	9.56285	11.0726	10.8128	8.00479	12.8332	9.13034
MT1G	16.4913	1093.31	576.039	373.941	734.318	607.384	974.584	1588.5	313.554	18.5276	8.38058	781.122	372.169	36.984	26.1571	50.636	222.818	5.85555	78.7976	188.405	634.079	604.302	58.2375	29.1328	487.444	1058.96	3305.01	3.04143	694.777	300.206	6.78671	188.3	64.425	610.104	543.019	855.352	194.762	276.874	679.324	588.967	16.4757	21.4557	961.259	655.27	943.058	7.53008	6.14931	42.9495	16.2968
ALOX15	0.0253838	0.0511339	0	0.00461854	0.00570512	0.0101598	0.0226302	0	0.00372426	0.0136832	0.0846098	0.0324917	0.0311046	0.0107125	0.00582726	0.0263393	0.0150247	0.020666	0	0.0330736	0.00590324	0	0.0448755	0.0238617	0.0190038	0.00403561	0.0106105	0.0656298	0	0.0305939	0.00801774	0.0338278	0.0861708	0.019904	0.0276357	0.0165515	0.0264676	0.0379873	0	0.0532747	0.0183337	0.0259946	0.0384214	0.0504279	0.0396029	0.0228841	0.0260552	0.0184464	0.018273
GPX4	45.3522	124.076	64.9172	78.2337	110.144	91.6068	117.645	94.9232	115.22	50.2688	67.0207	93.4163	81.9011	71.1849	58.3781	58.5166	62.024	71.4918	85.2868	76.1454	102.683	111.207	65.6824	78.4041	149.243	125.955	174.661	71.7075	96.435	120.895	89.9811	75.0176	87.3016	100.418	80.1139	122.01	71.6789	67.4119	88.829	107.82	83.7825	76.9155	109.807	107.852	104.977	72.7852	91.6901	120.514	63.0179
ALOX5	1.62157	2.64323	0.748193	2.77339	0.62478	8.9102	1.17305	1.45338	1.24055	0.47868	4.71466	1.5885	1.35544	0.93852	0.999777	1.51778	5.74514	0.929517	0.257041	3.66555	0.921228	0.785036	0.60065	1.40457	2.24417	1.13065	1.07967	5.34946	0.673815	5.08145	8.91941	1.04962	12.9541	2.84454	4.59731	2.67734	1.20772	1.81425	0.646869	7.06913	2.07051	1.64365	5.66712	3.61889	3.69046	3.69995	1.68824	20.483	0.700392
GLS2	0.387512	0.207164	0.189174	0.20881	0.300144	0.10857	0.21951	0.196748	0.25716	0.386179	0.29457	0.1717	0.290844	0.355173	0.435903	0.312401	0.129682	0.245111	0.208377	0.425934	0.247483	0.232478	0.35905	0.35552	0.168713	0.155916	0.156998	0.275425	0.209411	0.150894	0.29988	0.281162	0.135229	0.147254	0.201209	0.234698	0.30149	0.312264	0.234107	0.140138	0.380537	0.280839	0.232927	0.226107	0.264053	0.291574	0.21418	0.0227451	0.274131
CS	36.8809	29.946	26.9888	34.1639	30.1375	27.2154	32.8878	27.6257	31.941	34.0808	27.1912	25.0603	41.1811	30.4961	33.1096	37.1149	29.7342	33.5676	34.6844	36.8436	24.8373	29.8585	35.737	43.7766	26.1928	27.2899	24.7812	25.643	34.2421	22.4518	28.9891	44.1869	19.9099	27.26	25.1606	27.2487	36.6604	38.4596	30.5075	30.5078	28.0285	34.7178	27.1119	25.4406	28.7571	34.9617	31.7494	24.6208	37.812
CARS	2.69578	2.99394	2.10974	2.47484	2.34506	5.15811	2.76298	2.86915	3.01367	2.5183	3.1497	2.34398	2.10716	2.89921	2.96245	2.62498	3.64078	2.54819	2.40909	3.03849	2.2463	2.238	2.57511	3.14498	2.34729	2.58539	2.38041	2.88183	2.2068	2.264	3.09578	2.61191	3.14561	3.39407	2.98715	3.1982	2.72112	2.22021	2.23651	4.13754	3.28144	2.58433	3.33091	2.73483	3.1593	2.56114	2.16273	3.86152	2.48353
LPCAT3	8.26052	7.47022	4.93233	6.08563	4.00324	9.04302	8.21362	6.01847	5.81684	6.71967	5.68315	4.92567	5.52089	7.24163	7.50199	7.66609	9.74715	7.25695	3.61591	5.79525	3.39801	6.47312	6.75468	8.48568	7.47516	5.86121	7.91925	6.48002	4.53222	6.31242	7.66208	6.11425	4.39071	5.8361	5.4182	5.95606	5.78575	6.20317	5.03355	9.75244	7.74652	7.69418	6.64313	5.51217	6.92665	7.19074	4.09203	14.0002	6.4209
HSPB1	108.548	212.941	99.7342	162.815	133.909	358.135	147.212	174.955	115.392	120.691	252.376	148.42	134.075	198.566	157.17	122.503	136.186	250.556	178.445	194.39	124.921	193.847	212.101	102.805	122.656	211.935	155.248	326.809	136.274	145.263	347.594	99.9203	240.255	184.518	179.163	204.478	174.316	152.944	121.044	250.079	324.138	221.299	182.513	155.536	211.553	132.665	291.845	337.832	169.179
CISD1	20.2244	19.4782	18.6966	12.6619	18.0268	11.8992	19.4188	17.368	20.5625	16.1834	14.4454	17.487	23.672	18.5454	15.7883	24.4423	12.889	17.767	18.5377	19.1906	15.2767	18.6029	15.8477	26.0635	18.1047	19.5119	20.3726	13.9928	18.0932	22.4832	18.6471	21.4196	13.7203	18.5877	14.6148	19.9176	17.1912	16.8771	20.0953	15.1768	16.3283	15.3265	14.2197	16.5555	15.1832	24.4935	17.8967	17.6704	17.9997
ACSL4	24.7914	51.5686	34.6503	25.6249	34.351	40.9022	41.4527	34.0884	35.2615	23.4982	29.4231	32.6054	31.6093	23.829	25.7141	32.4893	72.6263	20.5785	17.594	40.8464	29.5107	29.4291	28.2621	27.6897	38.049	39.1815	21.0713	28.7382	34.3308	68.2838	31.3724	29.9926	89.2551	55.0728	51.585	37.2146	21.4721	21.6265	30.214	51.2493	32.8068	25.6442	43.9888	32.8839	68.6288	24.9842	14.4582	18.1866	21.6105
ATP5MC3	37.3827	52.4123	37.7676	38.7959	41.5616	26.0501	50.7829	37.1478	49.4175	41.8191	34.9632	36.1402	64.8047	44.4218	37.2057	41.2647	28.2462	48.0126	54.6411	48.1677	40.6308	41.8397	41.0654	65.7874	46.4043	50.1388	57.7465	29.0328	47.9652	43.1743	45.4088	55.8973	24.3337	35.8952	36.7388	49.3068	41.4221	41.7382	43.1401	34.3677	37.9511	43.5773	32.9522	37.9702	34.7006	62.4634	49.6145	31.5185	42.0342
FDFT1	28.1021	25.8097	15.6426	16.2836	19.144	22.9595	19.5471	18.2943	18.8357	22.9366	40.5569	14.9862	18.5168	19.8146	21.6777	28.5642	18.8079	23.8489	18.1984	50.8398	14.196	17.3611	27.6304	30.2936	19.0709	21.9394	17.6737	72.7343	17.7917	18.5781	31.4817	28.5108	17.4031	18.6849	18.4842	21.9754	18.225	17.055	17.2444	20.1915	24.0568	36.7633	17.6023	17.2101	17.8207	28.4091	31.9978	16.8084	34.7028
GCLC	4.18168	5.80581	5.07657	3.27879	4.43799	5.22864	5.22658	4.85422	5.87207	2.35007	3.03084	4.64505	3.27943	2.97882	3.54156	3.72917	4.72885	2.22532	2.37907	3.00498	4.31193	5.08096	2.22736	3.54155	5.79548	5.3647	6.51049	3.66234	4.35048	4.76224	2.29936	3.49076	3.08157	4.59854	3.86031	5.62879	2.9048	3.22733	4.92565	4.75706	2.81142	1.71621	4.47391	4.53606	5.46723	2.67543	1.98857	3.78953	3.28537
AKR1C2	2.72362	5.25469	0.15339	3.4478	0.202807	5.80696	0.303398	1.26923	1.33526	1.40597	4.45347	0.520939	1.49469	3.20788	16.3677	20.341	2.51791	3.07649	5.23508	6.68661	0.224839	0.188502	1.58005	2.21906	0.434283	0.329955	0.269418	42.2102	0.776225	0.522029	2.27403	0.916206	0.66834	0.408359	0.515259	1.42891	1.01577	1.29251	0.266757	0.492394	5.61886	2.65904	0.634128	0.27937	0.368713	15.9289	3.02675	0.217799	3.66314
CHAC1	5.2362	1.72779	3.87784	7.85311	1.75518	1.26874	7.79316	1.91091	3.70835	15.8503	6.04244	2.77925	10.2382	13.9388	6.60236	10.1945	0.608859	1.68469	7.95709	3.54973	1.46462	3.89817	4.18632	13.1675	3.55192	2.62996	2.31662	1.88541	3.82801	1.69015	5.56324	5.80661	0.919963	2.33087	2.11574	2.62131	13.146	7.97969	4.23952	1.58613	3.88155	2.40777	0.762604	2.66152	1.04807	3.91127	4.29884	0.175438	13.3062
AKR1C3	9.88043	24.8384	21.2073	7.51042	18.4908	23.3393	22.2492	18.5332	29.4349	3.76643	19.962	18.9638	9.19332	7.57328	7.2986	10.0893	13.2211	11.4241	7.98163	10.282	16.186	19.3163	5.50437	7.8283	27.0799	27.5649	29.5051	42.3731	18.2118	29.8136	16.687	7.57554	11.4743	14.7049	15.2828	31.4948	7.88639	9.10949	15.9622	23.0794	9.43313	8.13675	15.39	23.5054	13.9659	7.65007	10.8066	25.8335	15.2124
NCOA4	97.7	82.0341	94.5545	79.4323	87.3316	82.1779	100.923	79.0771	97.2606	96.3107	86.4912	79.1562	89.634	104.727	89.6437	110.173	79.0295	81.8476	80.5324	85.1905	60.742	90.6727	82.0067	128.691	103.832	93.2304	96.6044	67.3576	91.0552	124.95	71.7537	102.732	69.4269	90.5325	75.5725	97.2675	86.789	85.3745	87.0489	84.2937	65.6439	86.4497	72.7558	81.97	73.3732	98.917	78.0159	72.559	95.418
SAT1	74.0428	201.006	110.485	73.2012	141.096	132.721	111.695	117.246	102.627	84.4352	70.2294	118.964	69.9474	94.2437	101.864	95.1404	162.472	94.9921	104.036	128.832	115.484	98.6906	153.661	139.998	137.048	103.909	149.194	43.408	79.2789	132.983	169.01	102.832	129.081	171.797	108.775	126.734	88.5914	68.3814	132.113	210.219	159.749	97.5387	107.278	115.289	209.983	143.243	118.854	176.334	89.3741
AKR1C1	29.1882	7.78002	0.895081	2.90796	2.06645	3.6643	3.03285	1.58559	1.76944	7.71725	43.8026	5.0241	6.50964	14.9992	13.2188	14.2467	2.22026	38.9184	6.14937	6.34804	2.08362	2.09097	9.11511	12.5035	3.52516	2.64667	2.40202	35.2889	3.87827	3.03206	32.01	7.08661	2.94913	4.29958	2.21648	1.98029	6.08866	9.03792	1.29736	1.96661	6.34747	42.7862	3.74009	4.12121	3.37928	17.4183	24.9314	2.55531	23.3344
PTGS2	13.4683	1.51488	6.10963	3.30304	2.63163	4.31231	0.555564	8.10307	1.93926	11.7689	22.3116	2.36599	0.427017	9.06156	1.44563	31.1423	2.43636	3.53804	1.10634	0.493814	2.77641	2.65308	2.9552	1.99826	1.58622	2.14831	1.11391	36.0219	0.88148	1.68398	2.19883	3.49425	5.12671	1.48391	2.81581	3.02343	4.10626	6.45439	1.54959	1.45931	1.64933	1.53782	5.91381	1.76221	5.63158	16.881	9.63677	0.715031	16.48
DPP4	20.6756	29.949	20.7465	12.6331	33.2924	41.8092	40.2468	31.4954	42.851	20.0234	15.6566	30.1526	17.8167	17.1443	12.1416	22.0395	32.2497	20.9197	12.0511	18.0383	21.7916	34.1061	14.9513	16.2382	58.2446	45.9068	67.9604	35.0912	23.2043	39.1784	15.368	20.7153	21.1241	47.2825	46.9488	40.9539	6.73991	24.9347	36.7939	20.9405	26.8526	29.5466	19.932	31.2414	10.4633	16.4327	9.00819	8.52118	21.3154
ALOX15B	0.0122296	0.0821191	0.0161693	0.783998	0.0128271	0.125635	0.0407045	0.015523	0.0544273	0.0871665	0.0503556	0.0208722	0.0262253	0.0481709	0.0262034	0.01269	0.0506712	0.00331888	0.00633265	0.0206558	0.0132725	0.00662353	0.0201792	0.0201186	0.0811816	0.0136102	0.0715684	0.0349481	0.00970795	0.165086	0.0180267	0.0169015	0.431517	0.0358009	0.310673	0.0279101	0.548328	0.0142348	0	0.077857	0.0257629	0.00834928	0.0431924	0.0412289	0.0395738	0.222956	0.0146453	0.663584	0.0154066
TP53	9.75646	6.98083	5.39239	9.07501	6.87307	16.5275	9.34342	8.15639	6.78962	13.3879	14.8414	8.62671	6.78563	6.79712	7.70056	9.08566	15.034	6.66396	10.6497	19.0466	6.20299	7.33249	12.1165	7.5478	5.13435	8.03431	4.08807	16.1913	7.90158	7.68363	8.66408	10.9286	11.2192	10.7482	7.21791	8.53491	10.2744	8.7498	6.45306	19.3234	10.2864	11.2245	11.7462	9.04749	11.0361	10.9741	10.6133	10.4134	9.07105
TFRC	13.0496	8.24284	9.33649	9.6119	10.0536	11.745	9.48388	19.3073	13.7479	10.5179	11.7414	6.38861	12.2013	6.22783	6.78553	11.4735	24.3238	20.2737	4.70447	6.40764	10.548	10.3192	9.75507	7.30559	8.62683	12.0825	12.479	19.3255	12.7299	10.5739	4.41031	15.6804	8.64184	9.71585	7.76648	12.8441	7.76461	11.5531	12.7778	5.13207	4.82481	9.30712	10.8802	7.33859	12.1565	6.45935	7.87736	7.35833	12.723
FANCD2	0.677743	0.400676	0.289276	0.634264	0.338429	1.04643	0.566394	0.392727	0.341978	0.743123	0.839207	0.407359	0.345962	0.593393	0.887861	0.628344	0.647085	0.738903	0.423422	0.645018	0.280624	0.268116	0.702579	0.593823	0.264068	0.380405	0.245731	1.73186	0.464899	0.3928	0.900733	0.462725	0.471063	0.525657	0.333645	0.374913	0.520794	0.464744	0.251995	0.837686	0.612683	0.620121	0.478078	0.506636	0.665084	0.793416	0.693402	0.487163	0.668194
NFE2L2	35.5077	31.1559	25.1068	21.2591	27.1084	43.3556	28.1541	38.3326	30.6768	28.7433	42.2853	32.7527	24.3383	29.6367	28.8334	32.2514	41.7048	28.0023	31.6092	49.6977	26.2114	28.3549	36.1209	30.5733	19.4619	33.5676	18.1618	37.4336	28.3878	25.9213	27.3951	30.5791	39.6801	40.7267	30.5189	35.311	27.4272	25.9021	29.4375	37.7799	31.8381	41.3665	39.0128	30.0802	52.6722	30.4498	30.3242	22.687	39.0489
GCLM	3.97187	5.95033	4.9322	4.42058	5.13812	6.61048	4.93752	5.53292	7.79823	5.10177	4.76998	4.78672	4.3319	3.28996	4.32586	4.38843	5.96367	4.10697	3.44235	6.39537	5.18308	4.30724	4.77809	4.63636	6.76727	5.21862	4.54143	5.19135	3.64734	6.26387	5.16894	5.97467	4.38365	7.27034	5.37058	4.36592	4.54991	4.14064	4.28873	7.07655	4.29775	4.92805	5.04626	4.9781	8.01443	5.68421	3.59186	9.24207	4.70815
ALOX12	0.377485	0.465756	0.262022	0.546887	0.289522	0.436264	0.465262	0.473152	0.373149	0.724067	0.563434	0.271793	0.232726	0.497171	0.614188	0.563062	0.342134	0.580078	0.49844	0.535561	0.445523	0.368001	0.467144	0.357068	0.336303	0.267812	0.628202	0.409017	0.292159	0.358286	0.532076	0.689608	0.41793	0.357414	0.400699	0.430743	0.457564	0.318548	0.329404	0.339679	0.602371	0.468715	0.299969	0.501083	0.406532	0.401993	0.60179	0.480058	0.39827
CBS	0.0563891	0.0256498	0.0360748	0.141322	0.0200327	0.0101927	0.0953551	0.0230886	0.0579132	0.0892292	0.0649114	0.00232836	0.0195034	0.0662747	0.0175385	0.00188748	0.0715988	0.00444278	0.03956	0.0460845	0.0769909	0.0295551	0.121557	0.145131	0.0171589	0	0.0479021	0.0952985	0.0433181	0.0368317	0.126689	0.00188542	0.0471547	0.00998426	0.0257449	0.0498153	0.0986271	0.0656346	0.142858	0.0454303	0.0252906	0.0931389	0.057819	0.0367937	0.00441459	0.00382638	0.0522794	0	0.0664546
SLC7A11	0.0780684	0.0348042	0.017767	0.0961709	0.0322161	0.175698	0.0527133	0.0747252	0.0565192	0.0611699	0.156332	0.0311254	0.0686107	0.0768754	0.0616983	0.100927	0.121961	0.0677264	0.0139167	0.118023	0.0562524	0.0228737	0.0527929	0.204221	0.0321936	0.0313342	0.0786399	0.188959	0.0350493	0.0950178	0.161292	0.0835717	0.118884	0.0786766	0.126795	0.0554941	0.0453715	0.396246	0.0312703	0.120334	0.0549993	0.090432	0.0711902	0.0501565	0.110263	0.0444205	0.0390815	0.185543	0.0596541
CRYAB	156.494	83.7679	119.045	127.746	85.9061	522.063	116.901	172.073	183.588	125.896	245.322	142.525	180.954	123.202	126.312	201.693	183.893	283.173	155.267	179.037	100.943	116.073	169.616	106.391	302.247	103.264	107.402	441.394	67.4386	144.501	305.438	76.8889	134.657	186.024	188.666	224.213	116.928	151.419	100.963	418.156	115.585	224.022	163.688	114.523	218.662	202.544	221.891	366.045	174.324
[truncated: 562 more columns]
